# 1 Routine deworming during antenatal care decreases risk of neonatal 2 mortality and low birthweight: a retrospective cohort of survey data

## 3 Authors

4 Bhavneet Walia<sup>1</sup>, Brittany L. Kmush<sup>1</sup>, Sandra D. Lane<sup>1</sup>, Timothy Endy<sup>2</sup>, Antonio Montresor<sup>3</sup>, David A.  
5 Larsen<sup>1\*</sup>

6

7 1. Syracuse University Department of Public Health, Syracuse, NY, USA

8 2. State University of New York Upstate Medical University Department of Infectious Disease,  
9 Syracuse, NY, USA

10 3. Department of Control of Neglected Tropical Diseases, World Health Organization, Geneva,  
11 Switzerland

12 \* Corresponding author. [dalarsen@syr.edu](mailto:dalarsen@syr.edu)

## 13 Abstract

### 14 Background

15 Soil transmitted helminths (STH) are a common infection among pregnant women in areas with poor  
16 access to sanitation. Deworming medications are cheap and safe; however, the health benefit of  
17 deworming during pregnancy is not clear.

### 18 Methods / Principal Findings

19 We created a retrospective cohort of more than 800,000 births from 95 Demographic and Health  
20 Survey datasets to estimate the impact of deworming medicine during routine antenatal care (ANC) on  
21 neonatal mortality and low birthweight. We first matched births on the probability of receiving  
22 deworming during ANC. We then modeled the birth outcomes with the matched group as a random  
23 intercept to estimate the effect of deworming during antenatal care after accounting for various risk  
24 factors. We also tested for effect modification of soil transmitted helminth prevalence on the impact of  
25 deworming during ANC. Receipt of deworming medication during ANC was associated with a 15%  
26 reduction in the risk of neonatal mortality (95% confidence interval = 11-18%, n = 797,772 births), with  
27 no difference between high and low transmission countries. In low transmission countries, we found an  
28 11% reduction in the odds of low birth weight (95% confidence interval = 8-13%) for women receiving  
29 deworming medicine and in high transmission we found a 3% reduction in the odds of low birthweight  
30 (95% confidence interval = 1-5%).

## 31 Conclusions / Significance

32 These results suggest a substantial health benefit for deworming during ANC that may be even greater  
33 in countries with low STH transmission.

## 34 Introduction

### 35 Background/rationale

36 Soil transmitted helminths (STH) are parasitic nematodes (worms) that are transmitted by  
37 contamination of soil with human feces. The major species of STH that infect humans are *Ascaris*  
38 *lumbricoides* and *Trichuris trichiura* (whipworm), which infect humans via a fecal-oral route, and  
39 hookworm (*Anclostoma duodenale* and *Necator americanus*), whose eggs are shed in fecal matter and  
40 then hatched larvae burrow through the skin of the host. STH are estimated to infect more than two billion  
41 people across the globe [1], and in 2016 caused the loss of an estimated 3.5 million disability-adjusted life  
42 years (DALYs) [2].

43 STH affect human health in various ways. Hookworm is known to cause iron deficiency and anemia.  
44 For pregnant women, the resulting anemia can be particularly severe [3,4]. Infections with *T. trichiura* are  
45 also likely to cause anemia, and are associated with poor growth and delayed cognitive development in  
46 children [5]. Infections with *A. lumbricoides* are also associated with poor growth and delayed cognitive  
47 development in children [6].

48 Due to the fecal-oral route of transmission and the life stages in the soil, clean water and adequate  
49 sanitation access can easily prevent infections with STH [7–9]. However, sanitation access is still limited  
50 in lower-income countries, and therefore periodically clearing the parasites with deworming treatments is  
51 a short term intervention recommended by the WHO in STH endemic areas. The WHO manages a global  
52 donation of anthelmintics (albendazole and mebendazole) —with the support of several pharmaceutical  
53 companies who donate the medicines—providing them to endemic countries that request them for control  
54 programs targeting preschool children and school-age children. The effectiveness of deworming children  
55 has been called into question, however, due to recent reviews finding contradictory results of the health  
56 impact of mass drug administration in these populations [10–12]. A recent Cochrane review has also  
57 found limited evidence that deworming medicine during antenatal impacts birth outcomes or neonatal  
58 mortality [13]. However, the review evaluated less than 4,000 pregnancies in four studies, and the  
59 authors state that more data are needed to establish the benefit of the intervention or potential lack thereof.

### 60 Objectives

61 In this study, we explore the connection between anthelmintic treatment of pregnant women during  
62 antenatal care and the outcomes of neonatal mortality and low-birth weight using a retrospective cohort of  
63 survey data of more than 770,000 births across a broad range of STH transmission settings.

## 64 Methods

### 65 Study design

66 We utilized birth histories from cross-sectional surveys to create a retrospective cohort to measure the  
67 impact of routine deworming medicine during antenatal care on subsequent neonatal mortality and low  
68 birthweight for births between 1998-2018 in 56 lower income countries (Figure 1).

### 69 Data sources

70 The Demographic and Health Surveys (DHS) are funded at least in part by the United States Agency  
71 for International Development. These surveys utilize nationally representative two-stage cluster samples  
72 to generate information on child mortality and women's fertility. As part of the survey, complete birth  
73 histories are recorded for all women aged 15-49 years of age, including whether or not each child is still  
74 alive and the age of the child's death if the child died. Additionally, information on the most recent  
75 pregnancy within the previous 2 years is collected, including various aspects of the woman's antenatal  
76 care (ANC) such as a question on the administration of deworming during the most recent pregnancy. We  
77 sought to include all DHS datasets with the following conditions: 1) the survey was conducted in 1990 or  
78 after, 2) the survey contained information on deworming during ANC, and 3) the survey was publicly  
79 available as of August 23, 2019.

### 80 Outcomes

81 Neonatal mortality served as the primary outcome. In the DHS questionnaire, the survey respondent  
82 classifies the age of their child at death in terms of days, weeks, or months. Significant heaping of  
83 neonatal mortality occurs at one month of life in these data. We included children as neonatal deaths if  
84 their mother described them dying within the first 28 days of life, the first four weeks of life, or the first  
85 month of life.

86 Low birthweight served as the secondary outcome. In the DHS questionnaire, a child's weight at birth  
87 is included if the child is weighed at birth (approximately 50% of babies in the DHS are weighed at birth).  
88 The mother is also asked the child's perceived birth size. We created a composite indicator of measured  
89 low birthweight when available and perceived birth size when measured low birthweight was unavailable.  
90 For those children who were weighed at birth we categorized children as being low birth weight if they  
91 were < 2500 grams at birth. For those children who were not weighed at birth, we categorized children as  
92 low birth weight if they were perceived to be smaller than average or very small. We also conducted a  
93 sensitivity analysis wherein we limited the low birthweight analyses to those children who were weighed  
94 at birth.

## 95 Bias

96 Women who attend routine antenatal care and receive deworming medicines are predisposed to have  
97 better birth outcomes than women who do not, independent of the effect of the deworming medicine. This  
98 may include, among other factors, better ANC as well as better post-natal care. We therefore utilized an  
99 exact matching procedure to pre-process the data and reduce the selection bias of receiving deworming  
100 medicine [14]. We exactly matched women on their probability of receiving deworming during pregnancy  
101 using the MatchIt package in R version 3.6.1 [15,16]. The following equation describes the matching  
102 process:

$$Deworming_{ijk} = ANC_{ijk} + E_{ijk} + W_{jk} + S_k$$

103 where  $Deworming_{ijk}$  is a dichotomous outcome for woman  $i$  in household  $j$  in survey  $k$ ;  $ANC_{ijk}$  is a vector  
104 of various aspects of ANC, including being weighed during ANC, being measured during ANC, having  
105 blood pressure taken during ANC, giving a urine sample during ANC, giving a blood sample during  
106 ANC, receiving intermittent preventive treatment for malaria during ANC, and receiving a neonatal  
107 tetanus vaccination during ANC;  $E_{ijk}$  is whether the woman completed primary education or not;  $W_{jk}$  is  
108 whether or not house  $j$  is rich or poor; and  $S_k$  is the survey dataset.

## 109 Statistical methods

110 We modeled neonatal mortality as a function of receiving deworming medicine during ANC after  
111 adjusting for the following *a priori* determined covariates: the mother's age (categorized as < 18, 18-35,  
112 and >35), the mother's parity and birth order (categorized as firstborn, 2<sup>nd</sup> or 3<sup>rd</sup> born with < 24 months  
113 preceding birth interval, 2<sup>nd</sup> or 3<sup>rd</sup> born with  $\geq$  24 months preceding birth interval, 4<sup>th</sup> or later born with <  
114 24 months preceding birth interval, and 4<sup>th</sup> or later born with  $\geq$  24 months preceding birth interval), the  
115 presence of a skilled birth attendant during childbirth (doctor, nurse, or midwife), the location of child  
116 birth (at a health center or not), the household wealth quintile, the mother's education (categorized as no  
117 education, some primary, or completed primary or higher), the location of the house (urban or rural), the  
118 household's sanitation access (categorized as any or none), and the survey dataset. We utilized a Poisson  
119 model with the number of days alive (up to 28) included as the exposure and the matched group included  
120 as a random intercept. The analysis of neonatal mortality can be described using the following equation:

$$121 \mu_{ijkl} = e^{\ln(t_{ijkl}) + \beta_1 Deworming_{ijk} + \chi M_{ijk} + \delta H_{jk} + \kappa S_k + \zeta_l}$$

$$\zeta_l \sim N(0, \psi)$$

122 where  $\mu_{ijkl}$  is the rate of death for child  $i$  in house  $j$  in survey  $k$  in matched group  $l$ ,  $t_{ijkl}$  is the number of  
123 days the child was alive or at risk of death,  $Deworming_{ijk}$  is whether or not the child's mother received  
124 deworming during ANC,  $M_{ijk}$  is a vector of a child's mother's characteristics,  $H_{jk}$  is a vector a child's

125 household's characteristics,  $S_k$  is a vector of survey characteristics and  $\zeta_l$  is a random intercept for  
126 matched group  $l$  that is assumed to be normally distributed with a mean of zero.

127 We modeled low birth weight as a function of receiving deworming medicine during ANC after  
128 adjusting for the same *a priori* determined covariates as previously described. We utilized a logit model  
129 with the matched group included as a random intercept. The analysis of low birth weight can be described  
130 using the following equation:

$$y_{ijkl} | \pi_{ijkl} \sim \text{Binomial}(1, \pi_{ijkl})$$
$$\text{logit}(\pi_{ijkl}) = \beta_1 \text{Deworming}_{ijk} + \chi M_{ijk} + \delta H_{jk} + \kappa S_k + \zeta_l$$
$$\zeta_l \sim N(0, \psi)$$

131 where  $\pi_{ijkl}$  is a dichotomous outcome for child  $i$  in household  $j$  in survey  $k$  in matched group  $l$ ,  
132  $\text{Deworming}_{ijk}$  is whether the child's mother received deworming medicine during ANC,  $M_{ijk}$  is a  
133 vector of a child's mother's characteristics,  $H_{jk}$  is a vector of a child's household's characteristics,  $S_k$  is a  
134 vector of survey characteristics and  $\zeta_l$  is a random intercept for matched group  $l$  that is assumed to be  
135 normally distributed with a mean of zero. All analyses were conducted in Stata version 15.1.

136 We also tested whether the association between deworming medicine and the outcomes of neonatal  
137 mortality and low birthweight was moderated by the prevalence of any STH in the country. Based upon  
138 estimates provided by Pullan et al. [17], we categorized countries as being low (< 20%) or high (> 20%)  
139 STH prevalence and then tested for an interaction between low/high STH prevalence and receiving  
140 deworming during ANC using a likelihood ratio test of the log likelihoods.

## 141 Findings

### 142 Participants

143 As of October 2019, a total of 290 survey datasets listed at [www.dhsprogram.com](http://www.dhsprogram.com) contained  
144 information on either neonatal mortality, low birthweight, or deworming during ANC. Deworming during  
145 ANC was available for 95 of these datasets. One survey dataset (Rwanda 2007-08) did not have measures  
146 of low birth weight. This left 95 datasets available to create a retrospective cohort of 825,492 single live  
147 births to assess the impact of deworming during ANC on neonatal mortality and 94 datasets available to  
148 create a retrospective cohort of 807,957 single live births to assess the impact of deworming during ANC  
149 on low birthweight. Following exact matching, 95 datasets and 797,772 women were available for the  
150 outcome of neonatal mortality and 94 datasets and 772,155 women were available for the outcome of low  
151 birthweight. Figure 1 shows the geographic distribution of countries included in the analyses.

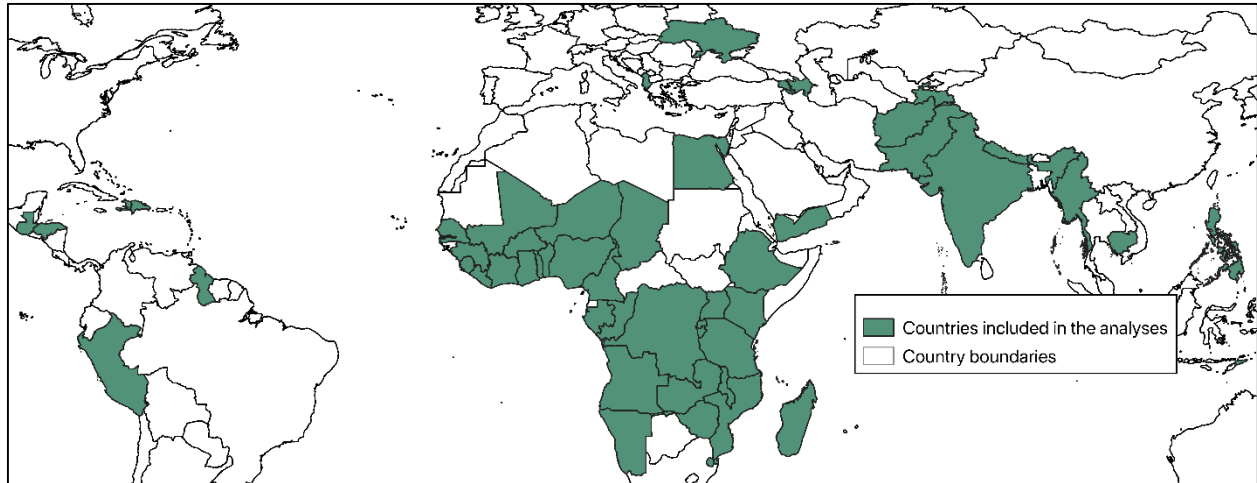

152

153 *Figure 1: Map showing the countries included in the analyses.*

154 **Descriptive data**

155 Among matched births, 25% of mothers reported receiving deworming medicine during ANC. Two  
 156 percent of births resulted in a neonatal death ( $n = 15,784$ ). Only 61% ( $n = 487,763$ ) of mothers reported a  
 157 measured birthweight. Among births with a measured birthweight, 12.5% ( $n = 61,177$ ) were  $< 2500$   
 158 grams. Mean birthweight was 3,072g (standard deviation = 691g). Among 770,300 births with a  
 159 perceived birth size, 93,802 mothers (12%) reported the baby to be “smaller than average” and 39,601  
 160 mothers reported the baby to be “very small” (5%). Table 1 provides dataset-level information on  
 161 deworming during ANC and birth outcomes.

162 *Table 1: Number of women receiving deworming medicine during routine ANC and birth outcomes.*

| Survey dataset           | Coverage of deworming during ANC | Neonatal deaths without deworming / N without deworming | Neonatal deaths with deworming / N with deworming | LBW without deworming / N without deworming | LBW with deworming / N with deworming |
|--------------------------|----------------------------------|---------------------------------------------------------|---------------------------------------------------|---------------------------------------------|---------------------------------------|
| <b>Afghanistan 2015</b>  | 3%                               | 396 / 17,773                                            | 20 / 616                                          | 3,800 / 17,355                              | 136 / 605                             |
| <b>Albania 2008-09</b>   | 3%                               | 6 / 933                                                 | 0 / 31                                            | 30 / 930                                    | 0 / 31                                |
| <b>Albania 2017-18</b>   | 2%                               | 2 / 1952                                                | 0 / 45                                            | 79 / 1,950                                  | 2 / 45                                |
| <b>Angola 2015-16</b>    | 46%                              | 113 / 4,607                                             | 69 / 3,939                                        | 514 / 4,262                                 | 365 / 3,855                           |
| <b>Armenia 2010</b>      | 1%                               | 5 / 1,136                                               | 0 / 7                                             | 70 / 1,134                                  | 1 / 7                                 |
| <b>Azerbaijan 2006</b>   | 3%                               | 31 / 1,430                                              | 1 / 51                                            | 123 / 1,201                                 | 8 / 47                                |
| <b>Benin 2011-12</b>     | 76%                              | 44 / 2,066                                              | 97 / 6,397                                        | 282 / 1,829                                 | 766 / 6,205                           |
| <b>Benin 2017-18</b>     | 66%                              | 66 / 2,841                                              | 122 / 5,578                                       | 379 / 2,801                                 | 616 / 5,529                           |
| <b>Burkina Faso 2010</b> | 26%                              | 138 / 7,471                                             | 32 / 2,562                                        | 1,025 / 7,456                               | 299 / 2,559                           |
| <b>Burundi 2010-11</b>   | 31%                              | 85 / 3,339                                              | 29 / 1,1519                                       | 445 / 3,281                                 | 155 / 1,503                           |
| <b>Burundi 2016-17</b>   | 66%                              | 31 / 2,888                                              | 93 / 5,708                                        | 361 / 2,879                                 | 582 / 5,697                           |
| <b>Cambodia 2005</b>     | 12%                              | 125 / 4,979                                             | 9 / 700                                           | 740 / 4,940                                 | 84 / 692                              |
| <b>Cambodia 2010</b>     | 50%                              | 74 / 3,105                                              | 45 / 3,106                                        | 344 / 2,969                                 | 226 / 3,051                           |
| <b>Cambodia 2014</b>     | 74%                              | 24 / 1,442                                              | 47 / 4,212                                        | 157 / 1,428                                 | 330 / 4,200                           |
| <b>Cameroon 2011</b>     | 43%                              | 86 / 4,090                                              | 58 / 3,069                                        | 579 / 4,059                                 | 299 / 3,053                           |
| <b>Chad 2014-15</b>      | 23%                              | 185 / 8,076                                             | 44 / 2,382                                        | 2,362 / 8,011                               | 508 / 2,376                           |
| <b>Comoros 2012</b>      | 60%                              | 19 / 722                                                | 18 / 1,077                                        | 178 / 685                                   | 209 / 1,048                           |

|                                |     |                 |              |                  |                |
|--------------------------------|-----|-----------------|--------------|------------------|----------------|
| <b>Congo 2011-12</b>           | 81% | 22 / 1,167      | 71 / 4,888   | 145 / 1,128      | 469 / 4,858    |
| <b>Cote d'Ivoire 2011</b>      | 38% | 96 / 3,110      | 43 / 1,877   | 447 / 3,024      | 271 / 1,851    |
| <b>DRC 2013-14</b>             | 52% | 121 / 5,190     | 107 / 5,724  | 451 / 5,075      | 470 / 5,667    |
| <b>Dominican Republic 2013</b> | 13% | 41 / 2,478      | 4 / 354      | 345 / 2,472      | 46 / 354       |
| <b>Egypt 2014</b>              | 4%  | 85 / 9,981      | 3 / 397      | 1,413 / 9,968    | 51 / 393       |
| <b>Eswatini 2006-07</b>        | 12% | 37 / 1,583      | 5 / 212      | 121 / 1,557      | 15 / 207       |
| <b>Ethiopia 2011</b>           | 6%  | 176 / 7,099     | 15 / 422     | 2,283 / 7081     | 120 / 422      |
| <b>Ethiopia 2016</b>           | 6%  | 149 / 6,438     | 10 / 415     | 1,668 / 6,366    | 95 / 411       |
| <b>Gabon 2012</b>              | 64% | 27 / 1,416      | 44 / 2,495   | 218 / 1,302      | 323 / 2,434    |
| <b>Gambia 2013</b>             | 43% | 38 / 2,947      | 27 / 2,215   | 541 / 2,939      | 300 / 2,211    |
| <b>Ghana 2008</b>              | 40% | 28 / 1,139      | 14 / 746     | 136 / 1,130      | 90 / 743       |
| <b>Ghana 2014</b>              | 44% | 41 / 2,280      | 31 / 1,800   | 1,203 / 8,431    | 89 / 623       |
| <b>Guatemala 2014-15</b>       | 7%  | 110 / 8,438     | 8 / 623      | 1,203 / 8,431    | 89 / 623       |
| <b>Guinea 2012</b>             | 30% | 88 / 3,368      | 23 / 1,473   | 387 / 3,361      | 131 / 1,473    |
| <b>Guyana 2009</b>             | 20% | 17 / 1,135      | 4 / 289      | 175 / 1,127      | 41 / 285       |
| <b>Haiti 2005-06</b>           | 7%  | 74 / 3,566      | 9 / 286      | 1,083 / 3,566    | 78 / 286       |
| <b>Haiti 2012</b>              | 15% | 104 / 4,294     | 16 / 785     | 1,331 / 4,288    | 199 / 785      |
| <b>Haiti 2016-17</b>           | 10% | 100 / 4,102     | 7 / 477      | 991 / 4,102      | 99 / 477       |
| <b>Honduras 2005-06</b>        | 8%  | 78 / 6,632      | 11 / 547     | 1,101 / 6,625    | 108 / 544      |
| <b>Honduras 2011-12</b>        | 7%  | 92 / 7,687      | 12 / 612     | 1,069 / 7,681    | 97 / 612       |
| <b>India 2005-06</b>           | 4%  | 782 / 34,248    | 26 / 1,433   | 7,304 / 33,761   | 284 / 1,422    |
| <b>India 2015-16</b>           | 15% | 3,504 / 159,219 | 468 / 29,185 | 25,971 / 155,748 | 4,785 / 28,940 |
| <b>Kenya 2008</b>              | 20% | 57 / 2,770      | 13 / 672     | 348 / 2,747      | 54 / 668       |
| <b>Kenya 2014</b>              | 31% | 66 / 4,744      | 41 / 2,179   | 549 / 4,679      | 202 / 2,172    |
| <b>Liberia 2007</b>            | 30% | 62 / 2,600      | 20 / 1,108   | 539 / 2,592      | 180 / 1,106    |
| <b>Liberia 2013</b>            | 57% | 55 / 2,230      | 61 / 2,978   | 459 / 2,228      | 543 / 2,971    |
| <b>Madagascar 2008-09</b>      | 40% | 93 / 4,984      | 47 / 3,373   | 916 / 4,911      | 531 / 3,320    |
| <b>Malawi 2010</b>             | 28% | 209 / 9,518     | 78 / 3,759   | 1,176 / 9,375    | 469 / 3,706    |
| <b>Malawi 2015-16</b>          | 52% | 123 / 6,289     | 115 / 6,816  | 780 / 6,245      | 841 / 6,781    |
| <b>Maldives 2009</b>           | 18% | 17 / 2,482      | 0 / 552      | 261 / 2,481      | 61 / 552       |
| <b>Mali 2012-13</b>            | 29% | 120 / 4,461     | 42 / 1,847   | 732 / 4,225      | 225 / 1,818    |
| <b>Mali 2018</b>               | 49% | 83 / 3,108      | 60 / 2,941   | 524 / 2,787      | 571 / 2,875    |
| <b>Mozambique 2011</b>         | 33% | 137 / 4,804     | 66 / 2,390   | 593 / 4,594      | 286 / 2,352    |
| <b>Myanmar 2015-16</b>         | 57% | 33 / 1,614      | 32 / 2,127   | 214 / 1,531      | 223 / 2,079    |
| <b>Namibia 2006-07</b>         | 8%  | 58 / 3,293      | 6 / 289      | 460 / 3,261      | 48 / 281       |
| <b>Namibia 2013</b>            | 7%  | 52 / 3,337      | 4 / 265      | 439 / 3,310      | 34 / 262       |
| <b>Nepal 2006</b>              | 19% | 80 / 3,276      | 15 / 786     | 639 / 3,274      | 139 / 786      |
| <b>Nepal 2011</b>              | 59% | 33 / 1,629      | 42 / 2,353   | 302 / 1,627      | 379 / 2,352    |
| <b>Nepal 2016</b>              | 74% | 21 / 1,021      | 28 / 2,910   | 163 / 1,020      | 402 / 2,905    |
| <b>Niger 2012</b>              | 51% | 64 / 3,705      | 65 / 3,793   | 854 / 3,490      | 810 / 3,748    |
| <b>Nigeria 2008</b>            | 10% | 440 / 15,188    | 36 / 1,656   | 2,379 / 15,062   | 172 / 1,650    |
| <b>Nigeria 2013</b>            | 16% | 465 / 16,073    | 91 / 3,001   | 2,445 / 15,971   | 315 / 2,991    |
| <b>Pakistan 2012-13</b>        | 2%  | 235 / 6,136     | 5 / 156      | 1,340 / 6,123    | 38 / 156       |
| <b>Pakistan 2017-18</b>        | 2%  | 194 / 6,823     | 2 / 163      | 1,344 / 6,804    | 32 / 159       |
| <b>Peru 2004-08</b>            | 4%  | 79 / 8,864      | 1 / 348      | 898 / 8,858      | 38 / 348       |
| <b>Peru 2009</b>               | 3%  | 72 / 7,871      | 1 / 280      | 750 / 7,866      | 30 / 280       |
| <b>Peru 2010</b>               | 3%  | 59 / 7,056      | 1 / 253      | 687 / 7,055      | 32 / 253       |
| <b>Peru 2011</b>               | 3%  | 60 / 6,967      | 2 / 251      | 646 / 6,966      | 28 / 251       |
| <b>Peru 2012</b>               | 3%  | 60 / 6,887      | 1 / 243      | 576 / 6,84       | 28 / 243       |
| <b>Philippines 2008</b>        | 5%  | 45 / 4,011      | 3 / 196      | 823 / 3,999      | 54 / 196       |

|                            |     |             |             |               |             |
|----------------------------|-----|-------------|-------------|---------------|-------------|
| <b>Philippines 2013</b>    | 5%  | 44 / 4,571  | 5 / 263     | 782 / 3,719   | 48 / 214    |
| <b>Philippines 2017</b>    | 7%  | 85 / 7,016  | 5 / 498     | 837 / 5,939   | 68 / 423    |
| <b>Rwanda 2007-08</b>      | 19% | 43 / 2,567  | 9 / 617     | .             | .           |
| <b>Rwanda 2010</b>         | 40% | 62 / 3,754  | 34 / 2,453  | 348 / 3,742   | 178 / 2,443 |
| <b>Rwanda 2014-15</b>      | 50% | 44 / 2,934  | 37 / 2,945  | 217 / 2,923   | 179 / 2,934 |
| <b>STP 2008</b>            | 59% | 6 / 551     | 7 / 794     | 45 / 537      | 52 / 770    |
| <b>Senegal 2010-11</b>     | 25% | 141 / 5,656 | 51 / 1,927  | 1,143 / 5,641 | 388 / 1,922 |
| <b>Senegal 2012-13</b>     | 28% | 59 / 2,823  | 17 / 1,107  | 697 / 2,821   | 236 / 1,105 |
| <b>Senegal 2014</b>        | 30% | 110 / 5,664 | 32 / 2,411  | 1,406 / 5,662 | 512 / 2,409 |
| <b>Senegal 2015</b>        | 32% | 54 / 2,903  | 31 / 1,369  | 672 / 2,902   | 234 / 1,368 |
| <b>Senegal 2016</b>        | 35% | 66 / 2,698  | 19 / 1,466  | 642 / 2,697   | 241 / 1,462 |
| <b>Senegal 2017</b>        | 44% | 107 / 4,290 | 72 / 3,380  | 891 / 4,286   | 670 / 3,374 |
| <b>Sierra Leone 2008</b>   | 47% | 61 / 1,945  | 57 / 1,720  | 325 / 1,913   | 283 / 1,687 |
| <b>Sierra Leone 2013</b>   | 74% | 79 / 2,110  | 198 / 6,140 | 326 / 2,050   | 675 / 6,038 |
| <b>Tajikistan 2017</b>     | 2%  | 45 / 4,000  | 0 / 83      | 296 / 3,867   | 10 / 79     |
| <b>Tanzania 2015-16</b>    | 63% | 47 / 2,563  | 74 / 4,306  | 273 / 2,542   | 362 / 4,284 |
| <b>Timor-Leste 2009-10</b> | 14% | 97 / 4,918  | 10 / 832    | 727 / 4,813   | 110 / 831   |
| <b>Timor-Leste 2016</b>    | 18% | 61 / 3,931  | 19 / 840    | 358 / 3,252   | 60 / 763    |
| <b>Togo 2013-14</b>        | 62% | 38 / 1,807  | 57 / 2,920  | 287 / 1,789   | 292 / 2,904 |
| <b>Uganda 2006</b>         | 27% | 63 / 3,464  | 23 / 1,293  | 648 / 3,435   | 203 / 1,289 |
| <b>Uganda 2011</b>         | 51% | 69 / 2,326  | 39 / 2,375  | 414 / 2,281   | 324 / 2,321 |
| <b>Uganda 2016</b>         | 61% | 112 / 3,888 | 110 / 6,129 | 574 / 3,800   | 692 / 6,050 |
| <b>Ukraine 2007</b>        | 7%  | 4 / 960     | 1 / 75      | 33 / 960      | 7 / 75      |
| <b>Yemen 2013</b>          | 3%  | 174 / 9,776 | 8 / 352     | 3,109 / 9,756 | 137 / 351   |
| <b>Zambia 2007</b>         | 39% | 69 / 2,293  | 31 / 1,450  | 237 / 2,273   | 109 / 1,444 |
| <b>Zambia 2013</b>         | 66% | 56 / 3,038  | 84 / 6,004  | 335 / 3,008   | 527 / 5,941 |
| <b>Zimbabwe 2010-11</b>    | 3%  | 59 / 3,211  | 1 / 103     | 279 / 3,164   | 10 / 103    |
| <b>Zimbabwe 2015</b>       | 3%  | 63 / 4,152  | 3 / 145     | 391 / 4,145   | 9 / 145     |

163

## 164 Main results

165 Before adjusting for any other covariates, 2.1% of births where mothers did not receive deworming  
 166 during ANC (12,873 / 610,118) and 1.8% of births where mothers did receive deworming (3,622 /  
 167 202,501) during ANC died within the neonatal period (relative risk of cumulative incidence = 0.85).

168 Before adjusting for any other covariates, 16.9% of babies where mothers did not receive deworming  
 169 during ANC (102,802 / 505,383) and 13.3% babies where mothers did receive deworming during ANC  
 170 (26,590 / 199,772) were considered low birth weight (relative risk of cumulative incidence = 0.79).

171 After adjusting for selection bias via exact matching and including other factors hypothesized to be  
 172 associated with neonatal mortality, receiving deworming during routine ANC was associated with a 14%  
 173 reduction in the risk of neonatal mortality (IRR = 0.86, 95% CI = 0.82 – 0.90) (Table 2). This relationship  
 174 was not moderated by STH prevalence: the likelihood ratio test for interaction was not statistically  
 175 significant (likelihood ratio [LR] = 2.19, p = 0.139).

176



177 *Table 2: Results from Poisson regression analysis of deworming during ANC and neonatal mortality.*

| Measure                         | Categorization                                                    | Unadjusted IRR<br>(95% CI) | P-value | Adjusted IRR<br>(95% CI) | P-value |
|---------------------------------|-------------------------------------------------------------------|----------------------------|---------|--------------------------|---------|
| <b>Deworming</b>                | No deworming during ANC                                           | Ref.                       | Ref.    | Ref.                     | Ref.    |
|                                 | Deworming during ANC                                              | 0.81 (0.78 – 0.85)         | < 0.001 | 0.86 (0.82 – 0.89)       | < 0.001 |
| <b>Skilled birth attendant</b>  | No doctor, nurse, or midwife during delivery                      | Ref.                       | Ref.    | Ref.                     | Ref.    |
|                                 | Doctor, nurse, or midwife during delivery                         | 0.91 (0.88 – 0.94)         | < 0.001 | 1.01 (0.94 – 1.08)       | 0.767   |
| <b>Facility delivery</b>        | Child was delivered somewhere other than a health center          | Ref.                       | Ref.    | Ref.                     | Ref.    |
|                                 | Child was delivered at a health center                            | 0.92 (0.89 – 0.95)         | < 0.001 | 1.11 (1.04 – 1.19)       | 0.002   |
| <b>Mother's age at delivery</b> | 18-35 years old                                                   | Ref.                       | Ref.    | Ref.                     | Ref.    |
|                                 | < 20 years old                                                    | 1.31 (1.25 – 1.38)         | < 0.001 | 1.18 (1.11 – 1.24)       | < 0.001 |
|                                 | > 35 years old                                                    | 1.59 (1.52 – 1.66)         | < 0.001 | 1.59 (1.52 – 1.66)       | < 0.001 |
| <b>Mother's parity</b>          | Child is firstborn                                                | Ref.                       | Ref.    | Ref.                     | Ref.    |
|                                 | 2 <sup>nd</sup> born ≥ 24 month preceding birth interval          | 0.67 (0.64 – 0.71)         | < 0.001 | 0.69 (0.65 – 0.73)       | < 0.001 |
|                                 | 2 <sup>nd</sup> born < 24 month preceding birth interval          | 0.91 (0.85 – 0.98)         | 0.013   | 0.91 (0.85 – 0.98)       | 0.002   |
|                                 | 3 <sup>rd</sup> born or later ≥ 24 month preceding birth interval | 0.90 (0.86 – 0.93)         | < 0.001 | 0.78 (0.74 – 0.82)       | < 0.001 |
|                                 | 3 <sup>rd</sup> born or later < 24 month preceding birth interval | 1.45 (1.38 – 1.52)         | < 0.001 | 1.30 (1.23 – 1.38)       | < 0.001 |
| <b>Mother's education</b>       | No education                                                      | Ref.                       | Ref.    | Ref.                     | Ref.    |
|                                 | Some primary school                                               | 0.95 (0.90 – 0.99)         | 0.022   | 1.02 (0.97 – 1.07)       | 0.488   |
|                                 | Completed primary school                                          | 0.93 (0.88 – 0.99)         | 0.020   | 1.02 (0.95 – 1.10)       | 0.529   |
|                                 | Some secondary school or higher                                   | 0.71 (0.68 – 0.74)         | < 0.001 | 0.87 (0.82 – 0.92)       | < 0.001 |
| <b>Household location</b>       | Rural                                                             | Ref.                       | Ref.    | Ref.                     | Ref.    |
|                                 | Urban                                                             | 1.14 (1.10 – 1.18)         | < 0.001 | 0.97 (0.93 – 1.01)       | 0.139   |
| <b>Sanitation access</b>        | Any type of sanitation access                                     | Ref.                       | Ref.    | Ref.                     | Ref.    |
|                                 | No sanitation access                                              | 1.29 (1.24 – 1.33)         | < 0.001 | 1.13 (1.09 – 1.18)       | < 0.001 |
| <b>Household wealth</b>         | Poorest wealth quintile                                           | Ref.                       | Ref.    | Ref.                     | Ref.    |
|                                 | Poorer wealth quintile                                            | 0.98 (0.94 – 1.03)         | 0.403   | 1.04 (0.99 – 1.09)       | 0.120   |
|                                 | Middle wealth quintile                                            | 0.90 (0.86 – 0.94)         | < 0.001 | 1.05 (0.99 – 1.10)       | 0.105   |
|                                 | Richer wealth quintile                                            | 0.82 (0.78 – 0.86)         | < 0.001 | 1.01 (0.95 – 1.08)       | 0.743   |
|                                 | Richest wealth quintile                                           | 0.69 (0.66 – 0.73)         | < 0.001 | 0.92 (0.85 – 0.99)       | 0.024   |

178 N = 797,771 children, 7,255 matched groups (adjusted model only), 95 survey datasets ranging from year  
 179 2005-2018. Unadjusted model standard errors were adjusted for survey cluster and included survey

180 dataset as a covariate. Adjusted model included a random intercept of matched group and survey dataset  
 181 as a covariate.

182 After adjusting for selection bias via exact matching and including other factors hypothesized to be  
 183 associated with low birthweight, receiving deworming during routine ANC was associated with a 6%  
 184 reduction in the odds of low birthweight (Odds ratio [OR] = 0.94, 95% CI = 0.92 – 0.95). This  
 185 relationship was moderated by STH prevalence (LR = 23.87,  $p < 0.001$ ). In low transmission countries (<  
 186 20% national STH prevalence according to Pullan et al. [17]), deworming during routine ANC was  
 187 associated with an 11% reduction in the odds of low birthweight (OR = 0.89, 95% CI = 0.87 – 0.92). In  
 188 high transmission countries (> 20% national STH prevalence), deworming during routine ANC was  
 189 associated with a 3% reduction in the odds of low birthweight (OR = 0.97, 95% CI = 0.95 – 0.99). Table  
 190 3 shows the results from the unadjusted and adjusted analyses of low birthweight.

191

192 *Table 3: Results from logistic regression analysis of deworming during ANC and low birthweight.*

| Measure                         | Categorization                                                | Unadjusted OR<br>(95% CI) | P-value | Adjusted OR<br>(95% CI) | P-value |
|---------------------------------|---------------------------------------------------------------|---------------------------|---------|-------------------------|---------|
| <b>Deworming</b>                | No deworming during ANC and < 20% national prevalence         | Ref.                      | Ref.    | Ref.                    | Ref.    |
|                                 | Deworming during ANC and < 20% national prevalence            | 0.80 (0.78 – 0.83)        | < 0.001 | 0.89 (0.87 – 0.92)      | < 0.001 |
|                                 | No deworming during ANC and > 20% national prevalence         | Ref.                      | Ref.    | Ref.                    | Ref.    |
|                                 | Deworming during ANC and > 20% national prevalence            | 0.89 (0.87 – 0.91)        | < 0.001 | 0.97 (0.95 – 0.99)      | < 0.001 |
| <b>Skilled birth attendant</b>  | No doctor, nurse, or midwife during delivery                  | Ref.                      | Ref.    | Ref.                    | Ref.    |
|                                 | Doctor, nurse, or midwife during delivery                     | 0.68 (0.67 – 0.69)        | < 0.001 | 0.85 (0.83 – 0.88)      | < 0.001 |
| <b>Facility delivery</b>        | Child was delivered somewhere other than a health center      | Ref.                      | Ref.    | Ref.                    | Ref.    |
|                                 | Child was delivered at a health center                        | 0.69 (0.68 – 0.71)        | < 0.001 | 0.93 (0.90 – 0.95)      | < 0.001 |
| <b>Mother's age at delivery</b> | 18-35 years old                                               | Ref.                      | Ref.    | Ref.                    | Ref.    |
|                                 | < 20 years old                                                | 1.30 (1.27 – 1.32)        | < 0.001 | 1.15 (1.12 – 1.17)      | < 0.001 |
|                                 | > 35 years old                                                | 1.08 (1.06 – 1.11)        | < 0.001 | 1.05 (1.02 – 1.07)      | < 0.001 |
| <b>Mother's parity</b>          | Child is firstborn                                            | Ref.                      | Ref.    | Ref.                    | Ref.    |
|                                 | 2 <sup>nd</sup> born $\geq$ 24 month preceding birth interval | 0.83 (0.81 – 0.84)        | < 0.001 | 0.82 (0.81 – 0.84)      | < 0.001 |
|                                 | 2 <sup>nd</sup> born < 24 month preceding birth interval      | 0.94 (0.92 – 0.97)        | < 0.001 | 0.90 (0.87 – 0.92)      | < 0.001 |
|                                 | 3 <sup>rd</sup> born or later $\geq$ 24                       | 0.91 (0.89 – 0.92)        | < 0.001 | 0.80 (0.79 – 0.82)      | < 0.001 |

|                           |                                                                   |                    |         |                    |         |
|---------------------------|-------------------------------------------------------------------|--------------------|---------|--------------------|---------|
|                           | month preceding birth interval                                    |                    |         |                    |         |
|                           | 3 <sup>rd</sup> born or later < 24 month preceding birth interval | 0.99 (0.97 – 1.01) | 0.372   | 0.86 (0.84 – 0.88) | < 0.001 |
| <b>Mother's education</b> | No education                                                      | Ref.               | Ref.    | Ref.               | Ref.    |
|                           | Some primary school                                               | 0.89 (0.87 – 0.91) | < 0.001 | 0.90 (0.88 – 0.92) | < 0.001 |
|                           | Completed primary school                                          | 0.77 (0.75 – 0.79) | < 0.001 | 0.80 (0.77 – 0.82) | < 0.001 |
|                           | Some secondary school or higher                                   | 0.67               | < 0.001 | 0.73 (0.71 – 0.75) | < 0.001 |
| <b>Household location</b> | Rural                                                             | Ref.               | Ref.    | Ref.               | Ref.    |
|                           | Urban                                                             | 1.26 (1.24 – 1.28) | < 0.001 | 0.95 (0.94 – 0.97) | < 0.001 |
| <b>Sanitation access</b>  | Any type of sanitation access                                     | Ref.               | Ref.    | Ref.               | Ref.    |
|                           | No sanitation access                                              | 1.32 (1.30 – 1.34) | < 0.001 | 1.10 (1.08 – 1.12) | < 0.001 |
| <b>Household wealth</b>   | Poorest wealth quintile                                           | Ref.               | Ref.    | Ref.               | Ref.    |
|                           | Poorer wealth quintile                                            | 0.83 (0.82 – 0.85) | < 0.001 | 0.90 (0.88 – 0.92) | < 0.001 |
|                           | Middle wealth quintile                                            | 0.74 (0.73 – 0.76) | < 0.001 | 0.82 (0.80 – 0.84) | < 0.001 |
|                           | Richer wealth quintile                                            | 0.68 (0.67 – 0.70) | < 0.001 | 0.80 (0.78 – 0.83) | < 0.001 |
|                           | Richest wealth quintile                                           | 0.56 (0.55 – 0.58) | < 0.001 | 0.72 (0.69 – 0.74) | < 0.001 |

193 N = 781,352 children, 7,170 matched groups (adjusted model only), 94 survey datasets ranging from year  
 194 2005-2018. Unadjusted model standard errors were adjusted for survey cluster and included survey  
 195 dataset as a covariate. Adjusted model included a random intercept of matched group and survey dataset  
 196 as a covariate.

197 Among the children who were weighed at birth, the effect of deworming during ANC on low  
 198 birthweight was somewhat smaller (OR = 0.97, 95% CI = 0.95 – 1.00, p = 0.022). There was also a  
 199 significant interaction between STH prevalence and receipt of deworming medicine during ANC (LR  
 200 10.28, p = 0.0013). Deworming during ANC effectively reduced the odds of low birth weight in low  
 201 transmission countries (OR = 0.93, 95% CI = 0.89 – 0.96), but not in high transmission countries (OR =  
 202 1.00, 95% CI = 0.97 – 1.03).

## 203 Interpretation

### 204 Key results

205 We provide empirical evidence as to the impact of deworming in pregnant women on the neonatal  
 206 health of their infants (low birthweight and neonatal mortality) across a large range of STH endemic  
 207 countries. Using a retrospective birth cohort of more than 770,000 births, we find that children born to  
 208 mothers who received deworming during antenatal care have a 14% lower risk of neonatal mortality (95%  
 209 CI = 11 – 16%). In countries with < 20% estimated national prevalence of any STH, deworming during  
 210 antenatal care was associated with an 11% reduction in the odds of low birthweight (95% CI = 8 – 13%).

211 In countries with > 20% estimated national prevalence of any STH, deworming during ANC was  
212 associated with a 3% reduction in the odds of low birthweight (95% CI = 1-5%).

### 213 Limitations

214 A number of limitations are present in this analysis. First, there is selection bias in women receiving  
215 deworming during ANC. Due to the inequity observed in children receiving deworming medicines [18],  
216 we suspect that mothers receiving deworming during ANC are predisposed to have better birth outcomes  
217 than mothers not receiving deworming during ANC. We have attempted to mitigate the selection bias by  
218 matching mothers on the probability that they receive deworming during ANC before analysis. There may  
219 still be some residual confounding in this analysis. Second, this study relies on mothers' recall of  
220 medicines received during their most recent pregnancy. There may be some recall error associated with  
221 mothers' abilities to remember all the medicines and supplements they received during pregnancy, and  
222 recall bias may be present if mothers of babies suffering neonatal deaths are more likely remember  
223 receiving deworming medicine or not better than mothers of surviving babies. We have attempted to  
224 mitigate this limitation by only including the most recent pregnancy and only including pregnancies  
225 within 5 years of the study. Third, because this study creates a retrospective cohort from historical birth  
226 outcomes we are unable to account for the mother's or child's health status at the time of pregnancy and  
227 birth. Fourth, this study relies on mothers' recall of the age of the child at death, which may lead to  
228 misclassification error in our outcome of neonatal mortality. As such, we observed heaping of death at  
229 one month of age. We have chosen to include children dying at one month of age as neonatal deaths. We  
230 do not expect the misclassification error to be related to receiving deworming during ANC and suspect no  
231 bias in this regard. And fifth, our measure of low birthweight is a composite indicator of a mother's  
232 perception of birth size or a mother's recall of the child's birth weight if the child was weighed at birth.  
233 This approach may lead to misclassification error in our outcome of low birth weight, but we do not  
234 expect it to bias the results as it is not likely to be associated with receiving deworming medicine during  
235 ANC. There were also no differences in the results when we limited the analysis to those babies who were  
236 weighed at birth.

### 237 Interpretation

238 These results suggest a strong benefit of deworming during ANC that is perhaps even more  
239 pronounced in low transmission areas. The half-life of deworming medicines is quite short (< 24 hours),  
240 and very little chemoprophylaxis is provided for women treated. Reinfection occurs rapidly in areas of  
241 high transmission, particularly among those who were previously infected [19,20]. Deworming should  
242 only be considered a stopgap measure, useful to reduce harm from STH infections as the world pursues  
243 universal access to improved sanitation. However, deworming should be available to all pregnant women

244 in STH-endemic countries, given the increased risk of low birthweight and neonatal mortality when living  
245 in communities where access to sanitation is limited [21].

246 Periodic deworming is a very low-cost intervention. Where infrastructure for distribution is in place,  
247 such as through school programs, vaccination campaigns or routine ANC, the intervention cost is a few  
248 cents for each individual treated [22,23]. Considered safe during pregnancy, the risk of side effects from  
249 the drug administration is also minimal because benzimidazoles are poorly absorbed and are normally  
250 expelled after killing the worms present in the intestine [24]. These results provide impetus to improve  
251 access to deworming medicines during routine ANC.

252 While some have called for randomized trials of deworming for pregnant women to establish efficacy,  
253 these results suggest that deworming reduces the risk of neonatal mortality and low birthweight. To our  
254 knowledge this is the largest analysis conducted on deworming and birth outcomes (more than 770,000  
255 births – previous Cocherane review has < 3,400), and in our view is the more appropriate approach to  
256 provide evidence on a relatively rare event like neonatal mortality. From an empirical perspective, a  
257 sample size of 3,400 does not allow for a great deal of variation in the outcome variable. That is, for low  
258 probability ( $p$ ) events,  $np$  is typically low unless  $n$  is sufficiently large to compensate. The approach we  
259 used herein also avoids the ethical dilemma of withholding an intervention from the control group, the  
260 major limitation to conducting randomized control trials of clearing parasites with deworming medicine.

261 The WHO recommends periodic deworming of children and women of reproductive age (including  
262 pregnant women after the first trimester) [24]. While in the last 10 years the coverage of the intervention  
263 scaled up significantly for preschool and school age children, reaching over 65% in 2017 [25], the scale  
264 up of coverage for women of reproductive age has been much slower, with an average of 23% of pregnant  
265 women in STH endemic countries receiving deworming during ANC [26]. A recent meeting of the WHO  
266 Advisory Group on deworming in girls and women of reproductive age [27] urged all stakeholders in  
267 women's health to take immediate action in their respective domains to ensure that women of  
268 reproductive age are now included in their STH policies and programs, and to invite WHO to develop  
269 support material to facilitate implementation of deworming programs [28].

270 The traditional understanding of host-parasite interactions during pregnancy is that the parasite takes  
271 nutrients from the pregnant host, that either causes anemia and/or reduces the nutrients passing to the  
272 fetus leading to intrauterine growth restriction [29,30], increased risk of low birthweight, and then  
273 subsequent neonatal mortality [31]. In this analysis, the impact of deworming on low birthweight was  
274 quite modest in high transmission areas (3% reduction) compared to the impact of deworming on neonatal  
275 mortality (14% reduction). These results provide some evidence that helminth infections may indeed  
276 decrease nutrient flow to the fetus, but perhaps raise questions about other ways in which helminth  
277 infections affect pregnancy.

278 We suspect the primary mechanism of protection for deworming medicines to be through improving  
279 the health of the mother and subsequently the health of the fetus. In order to survive within their hosts,  
280 STH modify their hosts' immune responses, downregulating T-cell activity and other immune responses  
281 [32]. This immunosuppression affects not only the hosts' immune response to the STH, but also the  
282 immune response to other pathogens. For example, chronic STH infection is associated with suboptimal  
283 immunity following the receipt of various vaccines [33]. And, in areas of high prevalence of STH, routine  
284 deworming led to improved immune responses to non-STH pathogens [34]. This effect of compromising  
285 maternal immunity may be particularly serious given that a pregnant woman's immune response is  
286 downregulated by the 18<sup>th</sup> week of fetal gestation to ensure the mother's body does not reject the fetus as  
287 a foreign body [35,36]. Furthermore, immune system downregulation passes through to the fetus.  
288 Helminth infections prime the immune system of the fetus, making children born to mothers with  
289 helminth infections more vulnerable to not only helminth infections after they are born, but other  
290 pathogens as well [37,38]. This mechanism could lead to increased risk of neonatal mortality for children  
291 of women who do not receive deworming medicines during antenatal care.

## 292 Conclusion

293 This large retrospective cohort of survey data suggests that deworming during antenatal care provides  
294 a protective benefit against neonatal mortality and low birthweight. This protection is even greater in  
295 countries with lower STH transmission.

## 296 Other information

### 297 Funding

298 The authors received no funding for this study, but are open to suggestions about how to fund their  
299 work.

### 300 Author contributions

301 Conceptualization, DAL; Methodology, BW, BK, DAL; Formal analysis, DAL; Data curation, BK,  
302 DAL; Writing – original draft, BW, DAL; Writing – review and editing, BW, BK, SL, TE, AM DAL;  
303 Visualization, DAL; Supervision, BK, DAL; Project administration, BK, DAL.

### 304 Acronyms

305 ANC = antenatal care

306 CI = confidence interval

307 DHS = demographic health survey

308 IRR = incident rate ratio

309 LR = likelihood ratio

310 OR = odds ratio

## 311 References

- 312 1. De Silva NR, Brooker S, Hotez PJ, Montresor A, Engels D, Savioli L. Soil-transmitted helminth  
313 infections: Updating the global picture. *Trends Parasitol.* 2003;19: 547–551.  
314 doi:10.1016/j.pt.2003.10.002
- 315 2. World Health Organization. Global health estimates 2016: Disease burden by cause, age, sex, by  
316 country and by region, 2000-2016. Geneva, Switzerland; 2018.
- 317 3. Gyorkos TW, Gilbert NL, Pasricha S, Drakesmith H, Black J, Hipgrave D, et al. Blood Drain:  
318 Soil-Transmitted Helminths and Anemia in Pregnant Women. Garba A, editor. *PLoS Negl Trop*  
319 *Dis. Public Library of Science*; 2014;8: e2912. doi:10.1371/journal.pntd.0002912
- 320 4. Larocque R, Casapia M, Gotuzzo E, Gyorkos TW. Relationship between intensity of soil-  
321 transmitted helminth infections and anemia during pregnancy. *Am J Trop Med Hyg.* 2005;73:  
322 783–9.
- 323 5. Stephenson LS, Holland CV, Cooper ES. The public health significance of *Trichuris trichiura*.  
324 *Parasitology.* 2000;121: S73–S95. doi:10.1017/s0031182000006867
- 325 6. O’Lorcain P, Holland CV. The public health importance of *Ascaris lumbricoides*. *Parasitology.*  
326 *Syracuse University Libraries*; 2000;121: S51–S71. doi:10.1017/s0031182000006442
- 327 7. Asaolu S., Ofoezie I. The role of health education and sanitation in the control of helminth  
328 infections. *Acta Trop.* 2003;86: 283–294. doi:10.1016/S0001-706X(03)00060-3
- 329 8. Strunz EC, Addiss DG, Stocks ME, Ogden S, Utzinger J, Freeman MC. Water, Sanitation,  
330 Hygiene, and Soil-Transmitted Helminth Infection: A Systematic Review and Meta-Analysis.  
331 Hales S, editor. *PLoS Med. Public Library of Science*; 2014;11: e1001620.  
332 doi:10.1371/journal.pmed.1001620
- 333 9. Ziegelbauer K, Speich B, Mäusezahl D, Bos R, Keiser J, Utzinger J. Effect of sanitation on soil-  
334 transmitted helminth infection: systematic review and meta-analysis. *PLoS Med.* 2012;9:  
335 e1001162. doi:10.1371/journal.pmed.1001162
- 336 10. Ahuja A, Baird S, Hicks JH, Kremer M, Miguel E, Powers S. Invited papers: When should  
337 governments subsidize health? The case of mass deworming. *World Bank Econ Rev.* 2015;29: S9–  
338 S24. doi:10.1093/wber/lhv008
- 339 11. Welch VA, Ghogomu E, Hossain A, Awasthi S, Bhutta ZA, Cumberbatch C, et al. Mass  
340 deworming to improve developmental health and wellbeing of children in low-income and middle-  
341 income countries: a systematic review and network meta-analysis. *Lancet Glob Heal.* The  
342 Author(s). Published by Elsevier Ltd. This is an Open Access article under the CC BY license;  
343 2017;5: e40–e50. doi:10.1016/S2214-109X(16)30242-X
- 344 12. Croke K, Hicks JH, Hsu E, Kremer M, Miguel E. Does Mass Deworming Affect Child Nutrition?  
345 Meta-Analysis, Cost-Effectiveness, and Statistical Power. *Policy Res Work Pap.* 2016;7921.
- 346 13. Salam RA, Haider BA, Humayun Q, Bhutta ZA. Effect of administration of antihelminthics for  
347 soil-transmitted helminths during pregnancy. *Cochrane Database Syst Rev.* 2015;2015.  
348 doi:10.1002/14651858.CD005547.pub3
- 349 14. Ho DE, Imai K, King G, Stuart EA. Matching as Nonparametric Preprocessing for Reducing  
350 Model Dependence in Parametric Causal Inference. *Polit Anal.* 2007;15: 199–236. Available:  
351 <http://gking.harvard.edu/files/abs/matchp-abs.shtml>
- 352 15. Ho D, Imai K, King G, Stuart EA. MatchIt: Nonparametric preprocessing for parametric causal  
353 inference. *Citeseer.* 2007; Available:  
354 <http://citeseerx.ist.psu.edu/viewdoc/download?doi=10.1.1.138.698&rep=rep1&type=pdf>
- 355 16. R Core Development Team. R: A Language and Environment for Statistical Computing.  
356 <http://www.R-project.org/>. R Foundation for Statistical Computing; 2010;
- 357 17. Pullan RL, Smith JL, Jasrasaria R, Brooker SJ. Global numbers of infection and disease burden of

- 358 soil transmitted helminth infections in 2010. *Parasites and Vectors*. 2014;7: 1–19.  
359 doi:10.1186/1756-3305-7-37
- 360 18. Lo NC, Heft-Neal S, Coulibaly JT, Leonard L, Bendavid E, Addiss DG. State of deworming  
361 coverage and equity in low-income and middle-income countries using household health surveys:  
362 a spatiotemporal cross-sectional study. *Lancet Glob Heal*. The Author(s). Published by Elsevier  
363 Ltd. This is an Open Access article under the CC BY 4.0 license; 2019;7: e1511–e1520.  
364 doi:10.1016/s2214-109x(19)30413-9
- 365 19. Jia TW, Melville S, Utzinger J, King CH, Zhou XN. Soil-transmitted helminth reinfection after  
366 drug treatment: A systematic review and meta-analysis. *PLoS Negl Trop Dis*. 2012;6.  
367 doi:10.1371/journal.pntd.0001621
- 368 20. Zerdo Z, Yohanes T, Tariku B. Soil-Transmitted Helminth Reinfection and Associated Risk  
369 Factors among School-Age Children in Chenchu District, Southern Ethiopia: A Cross-Sectional  
370 Study. *J Parasitol Res*. Hindawi Publishing Corporation; 2016;2016. doi:10.1155/2016/4737891
- 371 21. Kmush BL, Walia B, Neupane A, Frances C, Mohamed IA, Larsen DA. Does it matter where my  
372 neighbor poops? - Community-level impacts of sanitation access on maternal and neonatal health.  
373 The 68th Annual Meeting of the American Society of Tropical Medicine and Hygiene. National  
374 Harbor, Maryland; 2019.
- 375 22. Boselli G, Yajima A, Aratchige PE, Feldon KE, Xeuatvongsa A, Phounphenghak K, et al.  
376 Integration of deworming into an existing immunisation and vitamin A supplementation campaign  
377 is a highly effective approach to maximise health benefits with minimal cost in Lao PDR. *Int*  
378 *Health*. Royal Society of Tropical Medicine and Hygiene; 2011;3: 240–245.  
379 doi:10.1016/j.inhe.2011.08.002
- 380 23. Montresor A, Gabrielli AF, Diarra A, Engels D. Estimation of the cost of large-scale school  
381 deworming programmes with benzimidazoles. *Trans R Soc Trop Med Hyg*. 2010;104: 129–132.  
382 doi:10.1016/j.trstmh.2009.10.007
- 383 24. World Health Organization. Guideline: preventive chemotherapy to control soil-transmitted  
384 helminth infections in at-risk population groups. 2017.
- 385 25. World Health Organization. Schistosomiasis and soil-transmitted helminthiases: number of  
386 people treated in 2016. *Wkly Epidemiological Rec*. 2016; 585–595.
- 387 26. Bangert M, Bancalari P, Mupfasoni D, Mikhailov A, Gabrielli AF, Montresor A. Provision of  
388 deworming intervention to pregnant women by antenatal services in countries endemic for soil-  
389 transmitted helminthiasis. *PLoS Negl Trop Dis*. 2019;13: 7–13. doi:10.1371/journal.pntd.0007406
- 390 27. World Health Organization. Report of the WHO Advisory Group on deworming in girls and  
391 women of reproductive age. Geneva, Switzerland; 2018.
- 392 28. Gyorkos TW, Montresor A, Belizario V, Biggs BA, Bradley M, Brooker SJ, et al. The right to  
393 deworming: The case for girls and women of reproductive age. *PLoS Negl Trop Dis*. 2018;12: 9–  
394 12. doi:10.1371/journal.pntd.0006740
- 395 29. Rodríguez-Morales AJ, Barbella RA, Case C, Arria M, Ravelo M, Perez H, et al. Intestinal  
396 parasitic infections among pregnant women in Venezuela. *Infect Dis Obstet Gynecol*. 2006;2006:  
397 1–5. doi:10.1155/IDOG/2006/23125
- 398 30. Mahande AM, Mahande MJ. Prevalence of parasitic infections and associations with pregnancy  
399 complications and outcomes in northern Tanzania: A registry-based cross-sectional study. *BMC*  
400 *Infect Dis*. *BMC Infectious Diseases*; 2016;16: 1–9. doi:10.1186/s12879-016-1413-6
- 401 31. Rahman MM, Abe SK, Rahman MS, Kanda M, Narita S, Bilano V, et al. Maternal anemia and  
402 risk of adverse birth and health outcomes in low- and middle-income countries: systematic review  
403 and meta-analysis. *Am J Clin Nutr*. American Society for Nutrition; 2016;103: 495–504.  
404 doi:10.3945/ajcn.115.107896
- 405 32. McSorley HJ, Maizels RM. Helminth infections and host immune regulation. *Clin Microbiol Rev*.  
406 2012;25: 585–608. doi:10.1128/CMR.05040-11
- 407 33. Borkow G, Bentwich Z. Chronic parasite infections cause immune changes that could affect  
408 successful vaccination. *Trends Parasitol*. 2008;24: 243–245. doi:10.1016/j.pt.2008.02.009



- 409 34. Wammes LJ, Hamid F, Wiria AE, May L, Kaisar MMM, Prasetyani-Gieseler MA, et al.  
410 Community deworming alleviates geohelminth-induced immune hyporesponsiveness. *Proc Natl*  
411 *Acad Sci U S A*. 2016;113: 12526–12531. doi:10.1073/pnas.1604570113  
412 35. Clark DA. The importance of being a regulatory T cell in pregnancy. *J Reprod Immunol*. Elsevier  
413 Ireland Ltd; 2016;116: 60–69. doi:10.1016/j.jri.2016.04.288  
414 36. Seavey MM, Mosmann TR. Immunoregulation of fetal and anti-paternal immune responses.  
415 *Immunol Res*. 2008;40: 97–113. doi:10.1007/s12026-007-8005-x  
416 37. Mpairwe H, Tweyongyere R, Elliott A. Pregnancy and helminth infections. *Parasite Immunol*.  
417 2014;36: 328–337. doi:10.1111/pim.12101  
418 38. Blackwell AD. Helminth infection during pregnancy: Insights from evolutionary ecology. *Int J*  
419 *Womens Health*. 2016;8: 651–661. doi:10.2147/IJWH.S103529  
420
